# Supplementary material for: The Recombination Potential between SARS-CoV-2 and MERS-CoV from Cross-Species Spill-over Infections
Source: PubMed Central journal article supplement — J Epidemiol Glob Health. 2021 Jun;11(2):155–9. doi: 10.2991/jegh.k.201105.001 (PMC8242116; doi:10.2991/jegh.k.201105.001), 2021-06
Supplement: JEGH-11-2-155-s001.pdf [file JEGH-11-2-155-s001.pdf]

|              |       |                                                                      |       |
|--------------|-------|----------------------------------------------------------------------|-------|
| Query        | 15376 | TCCCTACGATTACTCAGATGAATTTGAAGTATGCTATTAGTGCTAAGAATCGTGCTCGCA         | 15435 |
| <u>Sbjct</u> | 15014 | TCCCTACTATAACTCAAATGAATCTTAAGTATGCCATTAGTGCAAAGAATAGAGCTCGCA         | 15073 |
| Query        | 15436 | CTGTTGCAGGCGTGTCTATACT-TAGTACCATGACTAATCGCCAATTCCACCAGAAAATG         | 15494 |
| <u>Sbjct</u> | 15074 | CCGTAGCTGGTGTCTCTAT-CTGTAGTACTATGACCAATAGACAGTTTCATCAAAAATTA         | 15132 |
| Query        | 15495 | <u>CTCAAGTCCATGGCTGCTACACGTGGCGCGACTTGT-GTCATTGGAACAACGAAGTTCTA</u>  | 15553 |
| <u>Sbjct</u> | 15133 | TTGAAATCAATAGCCGCCACTAGAGGAGCTAC-TGTAGTAATTGGAACAAGCAAATTCTA         | 15191 |
| Query        | 15554 | TGGTGGGTGGGATTTTATGCTGAAGAC-GTTGTATAAAGACGTCGAAAATCCACACCTAA         | 15612 |
| <u>Sbjct</u> | 15192 | TGGTGGTTGGCACAACATGTTAAAAACTGTT-TATAGTGATGTAGAAAACCTCACCTTA          | 15250 |
| Query        | 15613 | TGGGATGGGATTACCCTAAGTGTGATCGTGCTATGCCTAACATGTGTAGGATTTTTGCAT         | 15672 |
| <u>Sbjct</u> | 15251 | TGGGTTGGGATTATCCTAAATGTGATAGAGCCATGCCTAACATGCTTAGAATTATGGCCT         | 15310 |
| Query        | 15673 | <u>CTCTAATTCTTGACGCAAGCATGGAACCTGCTGCA-CTACTAGAGATAGATTTTACCGC</u>   | 15731 |
| <u>Sbjct</u> | 15311 | CACTTGTCTTGCTCGCAAACATACAACGTTGTAGCTTGT-CACACGTTTCTATAGA             | 15369 |
| Query        | 15732 | TTAGCTAATGAGTGCCTCAGGCTACTAAGCGAATATGTCCTCTGTGGTGGTGGTT-A-T-         | 15788 |
| <u>Sbjct</u> | 15370 | TTAGCTAATGAGTGTGCTCAAGTATTGAGTGAA-ATGGTC-ATGT-GTGGCGGTTCACTA         | 15426 |
| Query        | 15789 | <u>TACGTCAAACCTGGCGGAACC--AGCAGTGGCGATGCCACCACAGCTTATGCCAACAGTG</u>  | 15846 |
| <u>Sbjct</u> | 15427 | TATGTTAAACCAGGTGGAACCTCATCA--GGAGATGCCACAACCTGCTTATGCTAATAGTG        | 15484 |
| Query        | 15847 | <u>TCTTTAACATTTTGCAGGC-GACAACCTGCAATGTTAGTGCACCTTATGGGCGCTAATGGC</u> | 15905 |
| <u>Sbjct</u> | 15485 | TTTTTAACATTTGTCAAGCTGTC-ACGGCCAATGTTAATGCACCTTTATCTACTGATGGT         | 15543 |
| Query        | 15906 | AACAAAATTGTTGATAAAGAGAT-T-AGGGACATGCAATTC-GATTTGTATGTCAATGT-         | 15961 |
| <u>Sbjct</u> | 15544 | AACAAAATTGCCGATAA-G-TATGTCCGCAATTTACAACACAGACTT-TATG--AGTGTC         | 15598 |
| Query        | 15962 | T-TACAGGAATACTACTCCTGACCCCAAATTTGTAGATAAATATTATGCGTTTCTCAACA         | 16020 |
| <u>Sbjct</u> | 15599 | TCTATAGAAATAGAGATGTTGACACAGACTTTGTGAATGAGTTTTACGCATATTTGCGTA         | 15658 |
| Query        | 16021 | AGCACTTTTCTATGATGATACTATCTGATGATGGTGTGCTGCTATAACAGTGAC-TAT           | 16079 |
| <u>Sbjct</u> | 15659 | AACATTTCTCAATGATGATACTCTCTGACGATGCTGTTGTGTGTTTCAATAG-CACTTAT         | 15717 |
| Query        | 16080 | GCTTCAAAGGATACA-TTGCTGGCATAACAGAAATTTCAAAGAACTCTGTAACCAGAA           | 16138 |
| <u>Sbjct</u> | 15718 | GCATCTCAAGG-TCTAGTGGCTAGCATAAAGAACTTTAAGTCAGTTCCTTTATTATCAAAA        | 15776 |
| Query        | 16139 | <u>CAATGTGTTTATGTCTGAAGCTAAATGCTGGGTGGAGTCAGATTTGAAAAAAGGCCACA</u>   | 16198 |
| <u>Sbjct</u> | 15777 | CAATGTTTTTATGTCTGAAGCAAATGTTGGACTGAGACTGACCTTACTAAAGGACCTCA          | 15836 |
| Query        | 16199 | <u>TGAATTTTGTCTCAGCATACGCTTTTTATTAAGGATGGTGACGATGGTTACTTCCTGCC</u>   | 16258 |
| <u>Sbjct</u> | 15837 | TGAATTTTGTCTCAACATACAATGCTAGTTAAACAGGGTGATGATTATGTGTACCTTCC          | 15896 |

|       |       |                                                               |       |
|-------|-------|---------------------------------------------------------------|-------|
| Query | 16259 | TTATCCAGACCCTTCAAGGATTTTGTCTGCCGGTTGCTTTGTAGATGATATTGTTAAAAC  | 16318 |
| Sbjct | 15897 | TTACCCAGATCCATCAAGAATCCTAGGGGCCGGCTGTTTTGTAGATGATATCGTAAAAAC  | 15956 |
| Query | 16319 | TGATGGTACACTCATGGTAGAGAGGTTTGTTCCTTAGCCATTGATGCGTACCCTCTTAC   | 16378 |
| Sbjct | 15957 | AGATGGTACACTTATGATTGAACGGTTCGTGCTTTAGCTATAGATGCTTACCCACTTAC   | 16016 |
| Query | 16379 | AAAGCATGATGATAT-A-GAATACCAAAATGTATTCTGGGTGATTTACAGTACATTGAA   | 16436 |
| Sbjct | 16017 | TAAACATCCT-A-ATCAGGAGTATGCTGATGTCTTTTCATTTGACTTACAATACATAAGA  | 16074 |
| Query | 16437 | AAGCTGTACAAAGACCTTACAGGGCACATGCTGGACAGTTACTCTGTTATGCTATGTGGT  | 16496 |
| Sbjct | 16075 | AAGCTACATGATGAGTTAACAGGACACATGTTAGACATGTATTCTGTTATGCTTACTAAT  | 16134 |
| Query | 16497 | GATAATTCCGCTAAGTTCTGGG-AGGAGAGCTTTTATAGAGAACTCTATG-AAGCTCC-C  | 16553 |
| Sbjct | 16135 | GATAACACTTCAAGGTATTGGGAACCTGAG-TTTTAT-GAG---GCTATGTACACACCGC  | 16189 |
| Query | 16554 | A-CCA-CCCTGCAGGCTGTTGGTTCCTTGTGTAGTGTGCATTACAAACCTCGTTGCGTT   | 16611 |
| Sbjct | 16190 | ATACAGTCTTACAGGCTGTTGGGGCTTGTGTTCTTTGCAATTCACAGACTTCATTAAGAT  | 16249 |
| Query | 16612 | GTGGCACATGTATACGTAGACCTTTCTATGTTGTAAGTGTGTTACGATCATGTTATAG    | 16671 |
| Sbjct | 16250 | GTGGTGCTTGCATACGTAGACCATTCTTATGTTGTAATGCTGTTACGACCATGTCATAT   | 16309 |
| Query | 16672 | CAACTACTCATAAGATGGTTCTGTCAGTCTCA-CCTTACGTCTGTAATGCTCCTGGTTGT  | 16730 |
| Sbjct | 16310 | CAACATCACATAAATTAGTCTTGTCTGT-TAATCCGTATGTTGCAATGCTCCAGGTTGT   | 16368 |
| Query | 16731 | GACGTTTCAGATGTTACTAAACTGTATTTAGGTGGTATGAGCTACTTTTGTGTAGAT--C  | 16788 |
| Sbjct | 16369 | GATGTCACAGATGTGACTCAACTTTACTTAGGAGGTATGAGCTA-TTAT-TGTAAATCAC  | 16426 |
| Query | 16789 | ATAGACCGA-TATGCAGTTTTCCGCTTTGTGCTAATGGCCTAGTCTTTGGCCTTTACAAG  | 16847 |
| Sbjct | 16427 | ATAAACCCACCCAT-TAGTTTTCCATTGTGTGCTAATGGACAAGTTTTTGGTTTATATAAA | 16485 |
| Query | 16848 | AATATGTGCACAGGTAGTCCCT-CTGTATCAGAATTTAACAGACTGGCTACATGTGATTG  | 16906 |
| Sbjct | 16486 | AATACATGTGTTGGTAG-CGATAATGTTACTGACTTTAATGCAATTGCAACATGTGACTG  | 16544 |
| Query | 16907 | GTCTGAGAG-TGGTGATTACATACTCGCTAATACTACTACAGAACCCTTAAATTGTTTG   | 16965 |
| Sbjct | 16545 | GAC-AAATGCTGGTGATTACATTTTAGCTAACACCTGTACTGAAAGACTCAAGCTTTTTG  | 16603 |
| Query | 16966 | CTGCTGAGACATTGCGTGCCACTGAGGAGGCCTCTAAGCAGTCTTATGCAATCGCCACAA  | 17025 |
| Sbjct | 16604 | CAGCAGAAACGCTCAAAGCTACTGAGGAGACATTTAAACTGTCTTATGGTATTGCTAC-T  | 16662 |
| Query | 17026 | TAAAGAG-ATTGTAGGC-GAAAGAGAATTAATTCTTGTGTGGGAGACTGGAAAGTCCAA   | 17083 |
| Sbjct | 16663 | GT-ACGTGAAGTGTCTGTCTGACAGAGAATTACATCTTTCATGGGAAGTTGGTAAACCTAG | 16721 |
| Query | 17084 | ACCCCACTCAACCGTAATTATGTCTTTACTGGTTATCATATAACCAAGAATAGTAAAAGT  | 17143 |
| Sbjct | 16722 | ACCACCACTTAACCGAAATTATGTCTTTACTGGTTATCGTGTAACAAAAACAGTAAAGT   | 16781 |
